# Supplementary material for: A Proof-of-Concept Protein Microarray-Based Approach for Serotyping of Salmonella enterica Strains
Source: MDPI journal article supplement (doi:10.3390/pathogens13050355), 2024-04-25
Supplement: s1 [file s1]

**Supplementary Table S2:** All spotted polyclonal antisera and their dilutions are listed. The numbers represent positions on the microarray (see Supplemental Table S3).

| Well | Number | Substance name                     | Dilution |
|------|--------|------------------------------------|----------|
| A1   | 1      | TR1101_Anti-Salm_A-67_Vi_1_6_D12   | 1:6      |
| B1   | 2      | TR1101_Anti-Salm_A-67_Vi_1_10_D12  | 1:10     |
| C1   | 3      | TR1101_Anti-Salm_A-67_Vi_1_6       | 1:6      |
| D1   | 4      | TR1101_Anti-Salm_A-67_Vi_1_8       | 1:8      |
| E1   | 5      | TR1101_Anti-Salm_A-67_Vi_1_10      | 1:10     |
| F1   | 6      | TR1101_Anti-Salm_A-67_Vi_1_20      | 1:20     |
| G1   | 7      | TR1111_Anti-Salm_I_A-E_Vi_1_6_D12  | 1:6      |
| H1   | 8      | TR1111_Anti-Salm_I_A-E_Vi_1_10_D12 | 1:10     |
| I1   | 9      | TR1111_Anti-Salm_I_A-E_Vi_1_6      | 1:6      |
| J1   | 10     | TR1111_Anti-Salm_I_A-E_Vi_1_8      | 1:8      |
| K1   | 11     | TR1111_Anti-Salm_I_A-E_Vi_1_10     | 1:10     |
| L1   | 12     | TR1111_Anti-Salm_I_A-E_Vi_1_20     | 1:20     |
| M1   | 13     | TR1307_Anti-Salm_O-9_1_6_D12       | 1:6      |
| N1   | 14     | TR1307_Anti-Salm_O-9_1_10_D12      | 1:10     |
| O1   | 15     | TR1307_Anti-Salm_O-9_1_6           | 1:6      |
| P1   | 16     | TR1307_Anti-Salm_O-9_1_8           | 1:8      |
| A2   | 17     | TR1307_Anti-Salm_O-9_1_10          | 1:10     |
| B2   | 18     | TR1307_Anti-Salm_O-9_1_20          | 1:20     |
| C2   | 19     | TR1302_Anti-Salm_O-4_1_6_D12       | 1:6      |
| D2   | 20     | TR1302_Anti-Salm_O-4_1_10_D12      | 1:10     |
| E2   | 21     | TR1302_Anti-Salm_O-4_1_6           | 1:6      |
| F2   | 22     | TR1302_Anti-Salm_O-4_1_8           | 1:8      |
| G2   | 23     | TR1302_Anti-Salm_O-4_1_10          | 1:10     |
| H2   | 24     | TR1302_Anti-Salm_O-4_1_20          | 1:20     |
| I2   | 25     | TR1303_Anti-Salm_O-5_1_6_D12       | 1:6      |
| J2   | 26     | TR1303_Anti-Salm_O-5_1_10_D12      | 1:10     |
| K2   | 27     | TR1303_Anti-Salm_O-5_1_6           | 1:6      |
| L2   | 28     | TR1303_Anti-Salm_O-5_1_8           | 1:8      |
| M2   | 29     | TR1303_Anti-Salm_O-5_1_10          | 1:10     |
| N2   | 30     | TR1303_Anti-Salm_O-5_1_20          | 1:20     |
| O2   | 31     | TR1437_Anti-Salm_H-1_1_6_D12       | 1:6      |
| P2   | 32     | TR1437_Anti-Salm_H-1_1_10_D12      | 1:10     |
| A3   | 33     | TR1437_Anti-Salm_H-1_1_6           | 1:6      |
| B3   | 34     | TR1437_Anti-Salm_H-1_1_8           | 1:8      |
| C3   | 35     | TR1437_Anti-Salm_H-1_1_10          | 1:10     |
| D3   | 36     | TR1437_Anti-Salm_H-1_1_20          | 1:20     |
| E3   | 37     | TR1433_Anti-Salm_H-2_1_6_D12       | 1:6      |
| F3   | 38     | TR1433_Anti-Salm_H-2_1_10_D12      | 1:10     |
| G3   | 39     | TR1433_Anti-Salm_H-2_1_6           | 1:6      |
| H3   | 40     | TR1433_Anti-Salm_H-2_1_8           | 1:8      |
| I3   | 41     | TR1433_Anti-Salm_H-2_1_10          | 1:10     |
| J3   | 42     | TR1433_Anti-Salm_H-2_1_20          | 1:20     |
| K3   | 43     | TR1410_Anti-Salm_H-i_1_6_D12       | 1:6      |
| L3   | 44     | TR1410_Anti-Salm_H-i_1_10_D12      | 1:10     |
| M3   | 45     | TR1410_Anti-Salm_H-i_1_6           | 1:6      |
| N3   | 46     | TR1410_Anti-Salm_H-i_1_8           | 1:8      |
| O3   | 47     | TR1410_Anti-Salm_H-i_1_10          | 1:10     |
| P3   | 48     | TR1410_Anti-Salm_H-i_1_20          | 1:20     |
| A4   | 49     | TR1406_Anti-Salm_H-g_1_6_D12       | 1:6      |
| B4   | 50     | TR1406_Anti-Salm_H-g_1_10_D12      | 1:10     |

| Well | Number | Substance name               | Dilution       |
|------|--------|------------------------------|----------------|
| C4   | 51     | TR1406_Anti-Salm_H-g_1_6     | 1:6            |
| D4   | 52     | TR1406_Anti-Salm_H-g_1_8     | 1:8            |
| E4   | 53     | TR1406_Anti-Salm_H-g_1_10    | 1:10           |
| F4   | 54     | TR1406_Anti-Salm_H-g_1_20    | 1:20           |
| G4   | 55     | TS1413_Anti-Salm_H-m_1_6_D12 | 1:6            |
| H4   | 56     | TS1413_Anti-Salm_H-m_1_4_D12 | 1:10           |
| I4   | 57     | TS1413_Anti-Salm_H-m_1_6     | 1:6            |
| J4   | 58     | TS1413_Anti-Salm_H-m_1_8     | 1:8            |
| K4   | 59     | TS1413_Anti-Salm_H-m_1_10    | 1:10           |
| L4   | 60     | TS1413_Anti-Salm_H-m_1_20    | 1:20           |
| M4   | 61     | Buffer                       |                |
| N4   | 62     | Protein-A/G-HRP_0.2          | spot-conc. 0.2 |
