# Supplementary material for: A Proof-of-Concept Protein Microarray-Based Approach for Serotyping of Salmonella enterica Strains
Source: MDPI journal article supplement (doi:10.3390/pathogens13050355), 2024-04-25
Supplement: s1 [file s1]

## For Investigational Use Only. Not Intended for Use in Clinical Diagnostics.

**Operator** ---

**Sample ID** ---

**Experiment ID** S.e.e.\_Budapest

**Date of Result** Thu May 31 18:06:40 2012

**Assay Name** salm-pm1

**Assay ID** 10624

**Well Position** 00 (00-H)

**Software Version** 0.4

**Device** ---

**biotin** positive

**negative control** negative

**invA** positive

**galF** positive

**manC** positive

| score          | spp | serovare | strain  | group O |   |             | H1    | H2    |
|----------------|-----|----------|---------|---------|---|-------------|-------|-------|
| 0.0 (100.0 %)  | I   | Budapest | CDC23   | B (O:4) | 4 | 1,4,12,[27] | g,t   | -     |
| 2.74 (98.93 %) | I   | Agona    | CDC1636 | B (O:4) | 4 | 1,4,[5],12  | f,g,s | [1,2] |

## Resistance Genotyping

| description                                                                   | result   |
|-------------------------------------------------------------------------------|----------|
| aminoglycoside resistance (aac, aad, ant, arm)                                | negative |
| beta lactam resistance (dha, ctxM, pse, aac, blaCNY, oxa, cmv, per, shv, tem) | negative |
| bleomycin resistance (ble)                                                    | negative |
| chloramphenicol resistance (cat, cml)                                         | negative |
| erythromycin and roxythromycin resistance (qnr)                               | negative |
| erythromycin resistance (ere)                                                 | negative |
| florfenicol and chloramphenicol resistance (floR)                             | negative |
| fluoroquinolone resistance (qnr)                                              | negative |
| gentamicin resistance (aac)                                                   | negative |
| imipenem resistance (kpc)                                                     | negative |
| kanamycin resistance (aph)                                                    | negative |
| quinolone resistance (qnr)                                                    | negative |
| streptomycin resistance (sph, Str)                                            | negative |
| sulfonamide resistance (sul)                                                  | negative |
| tetracycline resistance (tet)                                                 | negative |
| trimethoprim resistance (dfr)                                                 | negative |

## Virulences

| description                    | result   |
|--------------------------------|----------|
| heat-stable enterotoxin (astA) | negative |
| integrases (intl)              | negative |
| plasmid Vi (tviA)              | negative |

## For Investigational Use Only. Not Intended for Use in Clinical Diagnostics.

**Operator** ---

**Sample ID** ---

**Experiment ID** S.e.e. Choleraeuis

**Date of Result** Thu May 31 18:05:40 2012

**Assay Name** salm-pm1

**Assay ID** 10624

**Well Position** 00 (00-H)

**Software Version** 0.4

**Device** ---

**biotin** positive

**negative control** negative

**invA** negative

**galF** positive

**manC** positive

| score          | spp | serovare    | strain   | group O  |   |     | H1 | H2  |
|----------------|-----|-------------|----------|----------|---|-----|----|-----|
| 0.0 (100.0 %)  | I   | Choleraeuis | CDC34    | C1 (O:7) | 7 | 6,7 | c  | 1,5 |
| 4.05 (98.41 %) | I   | Choleraeuis | DSM14846 | C1 (O:7) | 7 | 6,7 | c  | 1,5 |

## Resistance Genotyping

| description                                                                   | result   |
|-------------------------------------------------------------------------------|----------|
| aminoglycoside resistance (aac, aad, ant, arm)                                | negative |
| beta lactam resistance (dha, ctxM, pse, aac, blaCNY, oxa, cmv, per, shv, tem) | negative |
| bleomycin resistance (ble)                                                    | negative |
| chloramphenicol resistance (cat, cml)                                         | negative |
| erythromycin and roxythromycin resistance (qnr)                               | negative |
| erythromycin resistance (ere)                                                 | negative |
| florfenicol and chloramphenicol resistance (floR)                             | negative |
| fluoroquinolone resistance (qnr)                                              | negative |
| gentamicin resistance (aac)                                                   | negative |
| imipenem resistance (kpc)                                                     | negative |
| kanamycin resistance (aph)                                                    | negative |
| quinolone resistance (qnr)                                                    | negative |
| streptomycin resistance (sph, Str)                                            | negative |
| sulfonamide resistance (sul)                                                  | negative |
| tetracycline resistance (tet)                                                 | negative |
| trimethoprim resistance (dfr)                                                 | negative |

## Virulences

| description                    | result   |
|--------------------------------|----------|
| heat-stable enterotoxin (astA) | negative |
| integrases (intl)              | negative |
| plasmid Vi (tviA)              | negative |

## For Investigational Use Only. Not Intended for Use in Clinical Diagnostics.

**Operator** ---  
**Sample ID** ---  
**Experiment ID** S.e.e.\_Moscow  
**Date of Result** Thu May 31 18:12:56 2012  
**Assay Name** salm-pm1  
**Assay ID** 10624  
**Well Position** 00 (00-H)  
**Software Version** 0.4  
**Device** ---  
**biotin** positive  
**negative control** negative  
**invA** positive  
**galF** positive  
**manC** positive

| score          | spp | serovare | strain   | group O  |   |        | H1    | H2 |
|----------------|-----|----------|----------|----------|---|--------|-------|----|
| 0.27 (99.89 %) | I   | Moscow   | CDC67    | D1 (O:9) | 9 | 1,9,12 | g,q   | -  |
| 3.41 (98.66 %) | I   | Naestved | SGSC3612 | D1 (O:9) | 9 | 1,9,12 | g,p,s | -  |

## Resistance Genotyping

| description                                                                   | result   |
|-------------------------------------------------------------------------------|----------|
| aminoglycoside resistance (aac, aad, ant, arm)                                | negative |
| beta lactam resistance (dha, ctxM, pse, aac, blaCNY, oxa, cmv, per, shv, tem) | negative |
| bleomycin resistance (ble)                                                    | negative |
| chloramphenicol resistance (cat, cml)                                         | negative |
| erythromycin and roxythromycin resistance (qnr)                               | negative |
| erythromycin resistance (ere)                                                 | negative |
| florfenicol and chloramphenicol resistance (floR)                             | negative |
| fluoroquinolone resistance (qnr)                                              | negative |
| gentamicin resistance (aac)                                                   | negative |
| imipenem resistance (kpc)                                                     | negative |
| kanamycin resistance (aph)                                                    | negative |
| quinolone resistance (qnr)                                                    | negative |
| streptomycin resistance (sph, Str)                                            | negative |
| sulfonamide resistance (sul)                                                  | negative |
| tetracycline resistance (tet)                                                 | negative |
| trimethoprim resistance (dfr)                                                 | negative |

## Virulences

| description                    | result   |
|--------------------------------|----------|
| heat-stable enterotoxin (astA) | negative |
| integrases (intl)              | negative |
| plasmid Vi (tviA)              | negative |

## For Investigational Use Only. Not Intended for Use in Clinical Diagnostics.

**Operator** ---  
**Sample ID** ---  
**Experiment ID** S.e.e.\_Saintpaul  
**Date of Result** Thu May 31 10:00:29 2012  
**Assay Name** salm-pm1  
**Assay ID** 10624  
**Well Position** 00 (00-H)  
**Software Version** 0.4  
**Device** ---  
**biotin** positive  
**negative control** negative  
**invA** positive  
**galF** positive  
**manC** positive

| score          | spp | serovare  | strain | group O |   |            | H1  | H2  |
|----------------|-----|-----------|--------|---------|---|------------|-----|-----|
| 2.06 (99.19 %) | I   | Saintpaul | CDC108 | B (O:4) | 4 | 1,4,[5],12 | e,h | 1,2 |
| 6.81 (97.33 %) | I   | Bredeney  | CDC112 | B (O:4) | 4 | 1,4,12,27  | l,v | 1,7 |

## Resistance Genotyping

| description                                                                   | result   |
|-------------------------------------------------------------------------------|----------|
| aminoglycoside resistance (aac, aad, ant, arm)                                | negative |
| beta lactam resistance (dha, ctxM, pse, aac, blaCNY, oxa, cmv, per, shv, tem) | negative |
| bleomycin resistance (ble)                                                    | negative |
| chloramphenicol resistance (cat, cml)                                         | negative |
| erythromycin and roxythromycin resistance (qnr)                               | negative |
| erythromycin resistance (ere)                                                 | negative |
| florfenicol and chloramphenicol resistance (floR)                             | negative |
| fluoroquinolone resistance (qnr)                                              | negative |
| gentamicin resistance (aac)                                                   | negative |
| imipenem resistance (kpc)                                                     | negative |
| kanamycin resistance (aph)                                                    | negative |
| quinolone resistance (qnr)                                                    | negative |
| streptomycin resistance (sph, Str)                                            | negative |
| sulfonamide resistance (sul)                                                  | negative |
| tetracycline resistance (tet)                                                 | negative |
| trimethoprim resistance (dfr)                                                 | negative |

## Virulences

| description                    | result   |
|--------------------------------|----------|
| heat-stable enterotoxin (astA) | negative |
| integrases (intl)              | negative |
| plasmid Vi (tviA)              | negative |

## For Investigational Use Only. Not Intended for Use in Clinical Diagnostics.

Operator ---

Sample ID ---

Experiment ID S.e.e.\_Mississippi

Date of Result Thu May 31 18:15:35 2012

Assay Name salm-pm1

Assay ID 10624

Well Position 00 (00-H)

Software Version 0.4

Device ---

biotin positive

negative control negative

invA positive

galF positive

manC positive

| score         | spp | serovare    | strain | group O  |    |         | H1 | H2  |
|---------------|-----|-------------|--------|----------|----|---------|----|-----|
| 0.0 (100.0 %) | I   | Mississippi | CDC154 | G (O:13) | 13 | 1,13,23 | b  | 1,5 |
| 3.32 (98.7 %) | I   | Mississippi | CDC154 | G (O:13) | 13 | 1,13,23 | b  | 1,5 |

## Resistance Genotyping

| description                                                                   | result   |
|-------------------------------------------------------------------------------|----------|
| aminoglycoside resistance (aac, aad, ant, arm)                                | negative |
| beta lactam resistance (dha, ctxM, pse, aac, blaCNY, oxa, cmv, per, shv, tem) | negative |
| bleomycin resistance (ble)                                                    | negative |
| chloramphenicol resistance (cat, cml)                                         | negative |
| erythromycin and roxythromycin resistance (qnr)                               | negative |
| erythromycin resistance (ere)                                                 | negative |
| florfenicol and chloramphenicol resistance (floR)                             | negative |
| fluoroquinolone resistance (qnr)                                              | negative |
| gentamicin resistance (aac)                                                   | negative |
| imipenem resistance (kpc)                                                     | negative |
| kanamycin resistance (aph)                                                    | negative |
| quinolone resistance (qnr)                                                    | negative |
| streptomycin resistance (sph, Str)                                            | negative |
| sulfonamide resistance (sul)                                                  | negative |
| tetracycline resistance (tet)                                                 | negative |
| trimethoprim resistance (dfr)                                                 | negative |

## Virulences

| description                    | result   |
|--------------------------------|----------|
| heat-stable enterotoxin (astA) | negative |
| integrases (intl)              | negative |
| plasmid Vi (tviA)              | negative |

## For Investigational Use Only. Not Intended for Use in Clinical Diagnostics.

**Operator** ---  
**Sample ID** ---  
**Experiment ID** S.e.e.\_Cubana  
**Date of Result** Thu May 31 10:06:05 2012  
**Assay Name** salm-pm1  
**Assay ID** 10624  
**Well Position** 00 (00-H)  
**Software Version** 0.4  
**Device** ---  
**biotin** positive  
**negative control** negative  
**invA** positive  
**galF** positive  
**manC** positive

| score          | spp | serovare | strain | group O  |    |         | H1     | H2 |
|----------------|-----|----------|--------|----------|----|---------|--------|----|
| 0.61 (99.76 %) | I   | Cubana   | CDC207 | G (O:13) | 13 | 1,13,23 | z29    | -  |
| 5.31 (97.92 %) | I   | Ajiobo   | CDC527 | G (O:13) | 13 | 13,23   | z4,z23 | -  |

## Resistance Genotyping

| description                                                                   | result   |
|-------------------------------------------------------------------------------|----------|
| aminoglycoside resistance (aac, aad, ant, arm)                                | negative |
| beta lactam resistance (dha, ctxM, pse, aac, blaCNY, oxa, cmv, per, shv, tem) | negative |
| bleomycin resistance (ble)                                                    | negative |
| chloramphenicol resistance (cat, cml)                                         | negative |
| erythromycin and roxythromycin resistance (qnr)                               | negative |
| erythromycin resistance (ere)                                                 | negative |
| florfenicol and chloramphenicol resistance (floR)                             | negative |
| fluoroquinolone resistance (qnr)                                              | negative |
| gentamicin resistance (aac)                                                   | negative |
| imipenem resistance (kpc)                                                     | negative |
| kanamycin resistance (aph)                                                    | negative |
| quinolone resistance (qnr)                                                    | negative |
| streptomycin resistance (sph, Str)                                            | negative |
| sulfonamide resistance (sul)                                                  | negative |
| tetracycline resistance (tet)                                                 | negative |
| trimethoprim resistance (dfr)                                                 | negative |

## Virulences

| description                    | result   |
|--------------------------------|----------|
| heat-stable enterotoxin (astA) | negative |
| integrases (intl)              | negative |
| plasmid Vi (tviA)              | negative |

## For Investigational Use Only. Not Intended for Use in Clinical Diagnostics.

**Operator** ---  
**Sample ID** ---  
**Experiment ID** S.e.e.\_Stanleyville  
**Date of Result** Thu May 31 18:15:56 2012  
**Assay Name** salm-pm1  
**Assay ID** 10624  
**Well Position** 00 (00-H)  
**Software Version** 0.4  
**Device** ---  
**biotin** positive  
**negative control** negative  
**invA** positive  
**galF** positive  
**manC** positive

| score          | spp | serovare     | strain | group O |   |                 | H1     | H2    |
|----------------|-----|--------------|--------|---------|---|-----------------|--------|-------|
| 0.0 (100.0 %)  | I   | Stanleyville | CDC223 | B (O:4) | 4 | 1,4,[5],12,[27] | z4,z23 | [1,2] |
| 9.61 (96.23 %) | I   | Derby        | K007   | B (O:4) | 4 | 1,4,[5],12      | f,g    | [1,2] |

## Resistance Genotyping

| description                                                                   | result   |
|-------------------------------------------------------------------------------|----------|
| aminoglycoside resistance (aac, aad, ant, arm)                                | negative |
| beta lactam resistance (dha, ctxM, pse, aac, blaCNY, oxa, cmv, per, shv, tem) | negative |
| bleomycin resistance (ble)                                                    | negative |
| chloramphenicol resistance (cat, cml)                                         | negative |
| erythromycin and roxythromycin resistance (qnr)                               | negative |
| erythromycin resistance (ere)                                                 | negative |
| florfenicol and chloramphenicol resistance (floR)                             | negative |
| fluoroquinolone resistance (qnr)                                              | negative |
| gentamicin resistance (aac)                                                   | negative |
| imipenem resistance (kpc)                                                     | negative |
| kanamycin resistance (aph)                                                    | negative |
| quinolone resistance (qnr)                                                    | negative |
| streptomycin resistance (sph, Str)                                            | negative |
| sulfonamide resistance (sul)                                                  | negative |
| tetracycline resistance (tet)                                                 | negative |
| trimethoprim resistance (dfr)                                                 | negative |

## Virulences

| description                    | result   |
|--------------------------------|----------|
| heat-stable enterotoxin (astA) | negative |
| integrase (intl)               | negative |
| plasmid Vi (tviA)              | negative |

## For Investigational Use Only. Not Intended for Use in Clinical Diagnostics.

**Operator** ---  
**Sample ID** ---  
**Experiment ID** S.e.e. Gloucester  
**Date of Result** Thu May 31 18:17:42 2012  
**Assay Name** salm-pm1  
**Assay ID** 10624  
**Well Position** 00 (00-H)  
**Software Version** 0.4  
**Device** ---  
**biotin** positive  
**negative control** negative  
**invA** positive  
**galF** positive  
**manC** positive

| score          | spp | serovare                                | strain   | group O |   |            | H1 | H2  |
|----------------|-----|-----------------------------------------|----------|---------|---|------------|----|-----|
| 0.0 (100.0 %)  | I   | Gloucester                              | CDC443   | B (O:4) | 4 | 1,4,12,27  | i  | l,w |
| 6.08 (97.62 %) | I   | 1,4,[5],12:i:- (Typhimurium monophasic) | CDCQA126 | B (O:4) | 4 | 1,4,[5],12 | i  | -   |

## Resistance Genotyping

| description                                                                   | result   |
|-------------------------------------------------------------------------------|----------|
| aminoglycoside resistance (aac, aad, ant, arm)                                | negative |
| beta lactam resistance (dha, ctxM, pse, aac, blaCNY, oxa, cmv, per, shv, tem) | negative |
| bleomycin resistance (ble)                                                    | negative |
| chloramphenicol resistance (cat, cml)                                         | negative |
| erythromycin and roxythromycin resistance (qnr)                               | negative |
| erythromycin resistance (ere)                                                 | negative |
| florfenicol and chloramphenicol resistance (floR)                             | negative |
| fluoroquinolone resistance (qnr)                                              | negative |
| gentamicin resistance (aac)                                                   | negative |
| imipenem resistance (kpc)                                                     | negative |
| kanamycin resistance (aph)                                                    | negative |
| quinolone resistance (qnr)                                                    | negative |
| streptomycin resistance (sph, Str)                                            | negative |
| sulfonamide resistance (sul)                                                  | negative |
| tetracycline resistance (tet)                                                 | negative |
| trimethoprim resistance (dfr)                                                 | negative |

## Virulences

| description                    | result   |
|--------------------------------|----------|
| heat-stable enterotoxin (astA) | negative |
| integrases (intl)              | negative |
| plasmid Vi (tviA)              | negative |



## For Investigational Use Only. Not Intended for Use in Clinical Diagnostics.

**Operator** ---  
**Sample ID** ---  
**Experiment ID** S.e.e.\_Agama  
**Date of Result** Thu May 31 18:16:02 2012  
**Assay Name** salm-pm1  
**Assay ID** 10624  
**Well Position** 00 (00-H)  
**Software Version** 0.4  
**Device** ---  
**biotin** positive  
**negative control** negative  
**invA** positive  
**galF** positive  
**manC** positive

| score          | spp | serovare    | strain | group O |   |            | H1 | H2  |
|----------------|-----|-------------|--------|---------|---|------------|----|-----|
| 0.0 (100.0 %)  | I   | Agama       | CDC513 | B (O:4) | 4 | 4,12       | i  | 1,6 |
| 6.92 (97.29 %) | I   | Typhimurium | LT2    | B (O:4) | 4 | 1,4,[5],12 | i  | 1,2 |

## Resistance Genotyping

| description                                                                   | result   |
|-------------------------------------------------------------------------------|----------|
| aminoglycoside resistance (aac, aad, ant, arm)                                | negative |
| beta lactam resistance (dha, ctxM, pse, aac, blaCNY, oxa, cmv, per, shv, tem) | negative |
| bleomycin resistance (ble)                                                    | negative |
| chloramphenicol resistance (cat, cml)                                         | negative |
| erythromycin and roxythromycin resistance (qnr)                               | negative |
| erythromycin resistance (ere)                                                 | negative |
| florfenicol and chloramphenicol resistance (floR)                             | negative |
| fluoroquinolone resistance (qnr)                                              | negative |
| gentamicin resistance (aac)                                                   | negative |
| imipenem resistance (kpc)                                                     | negative |
| kanamycin resistance (aph)                                                    | negative |
| quinolone resistance (qnr)                                                    | negative |
| streptomycin resistance (sph, Str)                                            | negative |
| sulfonamide resistance (sul)                                                  | negative |
| tetracycline resistance (tet)                                                 | negative |
| trimethoprim resistance (dfr)                                                 | negative |

## Virulences

| description                    | result   |
|--------------------------------|----------|
| heat-stable enterotoxin (astA) | negative |
| integrases (intl)              | negative |
| plasmid Vi (tviA)              | negative |

## For Investigational Use Only. Not Intended for Use in Clinical Diagnostics.

**Operator** ---  
**Sample ID** ---  
**Experiment ID** S.e.e.\_Goeteborg  
**Date of Result** Thu May 31 09:54:43 2012  
**Assay Name** salm-pm1  
**Assay ID** 10624  
**Well Position** 00 (00-H)  
**Software Version** 0.4  
**Device** ---  
**biotin** positive  
**negative control** negative  
**invA** negative  
**galF** positive  
**manC** positive

| score           | spp | serovare  | strain | group O  |   |        | H1  | H2  |
|-----------------|-----|-----------|--------|----------|---|--------|-----|-----|
| 4.76 (98.13 %)  | I   | Goeteborg | CDC696 | D1 (O:9) | 9 | 9,12   | c   | 1,5 |
| 10.38 (95.93 %) | I   | Panama    | CDC73  | D1 (O:9) | 9 | 1,9,12 | I,v | 1,5 |

## Resistance Genotyping

| description                                                                   | result   |
|-------------------------------------------------------------------------------|----------|
| aminoglycoside resistance (aac, aad, ant, arm)                                | negative |
| beta lactam resistance (dha, ctxM, pse, aac, blaCNY, oxa, cmv, per, shv, tem) | negative |
| bleomycin resistance (ble)                                                    | negative |
| chloramphenicol resistance (cat, cml)                                         | negative |
| erythromycin and roxythromycin resistance (qnr)                               | negative |
| erythromycin resistance (ere)                                                 | negative |
| florfenicol and chloramphenicol resistance (floR)                             | negative |
| fluoroquinolone resistance (qnr)                                              | negative |
| gentamicin resistance (aac)                                                   | negative |
| imipenem resistance (kpc)                                                     | negative |
| kanamycin resistance (aph)                                                    | negative |
| quinolone resistance (qnr)                                                    | negative |
| streptomycin resistance (sph, Str)                                            | negative |
| sulfonamide resistance (sul)                                                  | negative |
| tetracycline resistance (tet)                                                 | negative |
| trimethoprim resistance (dfr)                                                 | negative |

## Virulences

| description                    | result   |
|--------------------------------|----------|
| heat-stable enterotoxin (astA) | negative |
| integrases (intl)              | negative |
| plasmid Vi (tviA)              | negative |

## For Investigational Use Only. Not Intended for Use in Clinical Diagnostics.

**Operator** ---  
**Sample ID** ---  
**Experiment ID** S.e.e.\_Potsdam  
**Date of Result** Thu May 31 10:05:26 2012  
**Assay Name** salm-pm1  
**Assay ID** 10624  
**Well Position** 00 (00-H)  
**Software Version** 0.4  
**Device** ---  
**biotin** positive  
**negative control** negative  
**invA** positive  
**galF** positive  
**manC** positive

| score          | spp | serovare | strain | group O  |   |        | H1    | H2      |
|----------------|-----|----------|--------|----------|---|--------|-------|---------|
| 1.04 (99.59 %) | I   | Potsdam  | CDC876 | C1 (O:7) | 7 | 6,7,14 | I,v   | e,n,z15 |
| 4.58 (98.2 %)  | I   | Kenya    | CDC497 | C1 (O:7) | 7 | 6,7    | I,z13 | e,n,x   |

## Resistance Genotyping

| description                                                                   | result   |
|-------------------------------------------------------------------------------|----------|
| aminoglycoside resistance (aac, aad, ant, arm)                                | negative |
| beta lactam resistance (dha, ctxM, pse, aac, blaCNY, oxa, cmv, per, shv, tem) | negative |
| bleomycin resistance (ble)                                                    | negative |
| chloramphenicol resistance (cat, cml)                                         | negative |
| erythromycin and roxythromycin resistance (qnr)                               | negative |
| erythromycin resistance (ere)                                                 | negative |
| florfenicol and chloramphenicol resistance (floR)                             | negative |
| fluoroquinolone resistance (qnr)                                              | negative |
| gentamicin resistance (aac)                                                   | negative |
| imipenem resistance (kpc)                                                     | negative |
| kanamycin resistance (aph)                                                    | negative |
| quinolone resistance (qnr)                                                    | negative |
| streptomycin resistance (sph, Str)                                            | negative |
| sulfonamide resistance (sul)                                                  | negative |
| tetracycline resistance (tet)                                                 | negative |
| trimethoprim resistance (dfr)                                                 | negative |

## Virulences

| description                    | result   |
|--------------------------------|----------|
| heat-stable enterotoxin (astA) | negative |
| integrases (intl)              | negative |
| plasmid Vi (tviA)              | negative |

## For Investigational Use Only. Not Intended for Use in Clinical Diagnostics.

**Operator** ---  
**Sample ID** ---  
**Experiment ID** S.e.e. Dublin  
**Date of Result** Thu May 31 18:05:34 2012  
**Assay Name** salm-pm1  
**Assay ID** 10624  
**Well Position** 00 (00-H)  
**Software Version** 0.4  
**Device** ---  
**biotin** positive  
**negative control** negative  
**invA** positive  
**galF** positive  
**manC** positive

| score          | spp | serovare | strain   | group O  |   |            | H1    | H2 |
|----------------|-----|----------|----------|----------|---|------------|-------|----|
| 0.34 (99.86 %) | I   | Dublin   | CDC65    | D1 (O:9) | 9 | 1,9,12[Vi] | g,p   | -  |
| 2.25 (99.12 %) | I   | Naestved | SGSC3612 | D1 (O:9) | 9 | 1,9,12     | g,p,s | -  |

## Resistance Genotyping

| description                                                                   | result   |
|-------------------------------------------------------------------------------|----------|
| aminoglycoside resistance (aac, aad, ant, arm)                                | negative |
| beta lactam resistance (dha, ctxM, pse, aac, blaCNY, oxa, cmv, per, shv, tem) | negative |
| bleomycin resistance (ble)                                                    | negative |
| chloramphenicol resistance (cat, cml)                                         | negative |
| erythromycin and roxythromycin resistance (qnr)                               | negative |
| erythromycin resistance (ere)                                                 | negative |
| florfenicol and chloramphenicol resistance (floR)                             | negative |
| fluoroquinolone resistance (qnr)                                              | negative |
| gentamicin resistance (aac)                                                   | negative |
| imipenem resistance (kpc)                                                     | negative |
| kanamycin resistance (aph)                                                    | negative |
| quinolone resistance (qnr)                                                    | negative |
| streptomycin resistance (sph, Str)                                            | negative |
| sulfonamide resistance (sul)                                                  | negative |
| tetracycline resistance (tet)                                                 | negative |
| trimethoprim resistance (dfr)                                                 | negative |

## Virulences

| description                    | result   |
|--------------------------------|----------|
| heat-stable enterotoxin (astA) | negative |
| integrases (intl)              | negative |
| plasmid Vi (tviA)              | negative |

## For Investigational Use Only. Not Intended for Use in Clinical Diagnostics.

**Operator** ---  
**Sample ID** ---  
**Experiment ID** CDC68\_S.e.e.\_Blegdam  
**Date of Result** Thu May 31 10:09:39 2012  
**Assay Name** salm-pm1  
**Assay ID** 10624  
**Well Position** 00 (00-H)  
**Software Version** 0.4  
**Device** ---  
**biotin** positive  
**negative control** negative  
**invA** negative  
**galF** positive  
**manC** positive

| score          | spp | serovare | strain    | group O  |   |      | H1    | H2 |
|----------------|-----|----------|-----------|----------|---|------|-------|----|
| 2.06 (99.19 %) | I   | Blegdam  | CDC68     | D1 (O:9) | 9 | 9,12 | g,m,q | -  |
| 4.53 (98.22 %) | I   | Blegdam  | CDC090361 | D1 (O:9) | 9 | 9,12 | g,m,q | -  |

## Resistance Genotyping

| description                                                                   | result   |
|-------------------------------------------------------------------------------|----------|
| aminoglycoside resistance (aac, aad, ant, arm)                                | negative |
| beta lactam resistance (dha, ctxM, pse, aac, blaCNY, oxa, cmv, per, shv, tem) | negative |
| bleomycin resistance (ble)                                                    | negative |
| chloramphenicol resistance (cat, cml)                                         | negative |
| erythromycin and roxythromycin resistance (qnr)                               | negative |
| erythromycin resistance (ere)                                                 | negative |
| florfenicol and chloramphenicol resistance (floR)                             | negative |
| fluoroquinolone resistance (qnr)                                              | negative |
| gentamicin resistance (aac)                                                   | negative |
| imipenem resistance (kpc)                                                     | negative |
| kanamycin resistance (aph)                                                    | negative |
| quinolone resistance (qnr)                                                    | negative |
| streptomycin resistance (sph, Str)                                            | negative |
| sulfonamide resistance (sul)                                                  | negative |
| tetracycline resistance (tet)                                                 | negative |
| trimethoprim resistance (dfr)                                                 | negative |

## Virulences

| description                    | result   |
|--------------------------------|----------|
| heat-stable enterotoxin (astA) | negative |
| integrases (intl)              | negative |
| plasmid Vi (tviA)              | negative |

## For Investigational Use Only. Not Intended for Use in Clinical Diagnostics.

**Operator** ---  
**Sample ID** ---  
**Experiment ID** S.e.e.\_Inverness  
**Date of Result** Thu May 31 10:06:49 2012  
**Assay Name** salm-pm1  
**Assay ID** 10624  
**Well Position** 00 (00-H)  
**Software Version** 0.4  
**Device** ---  
**biotin** positive  
**negative control** negative  
**invA** positive  
**galF** positive  
**manC** positive

| score          | spp | serovare  | strain  | group O  |    |      | H1     | H2  |
|----------------|-----|-----------|---------|----------|----|------|--------|-----|
| 0.9 (99.65 %)  | I   | Inverness | CDC171  | P (O:38) | 38 | 38   | k      | 1,6 |
| 6.72 (97.36 %) | I   | Gera      | CDC1316 | T (O:42) | 42 | 1,42 | z4,z23 | 1,6 |

## Resistance Genotyping

| description                                                                   | result   |
|-------------------------------------------------------------------------------|----------|
| aminoglycoside resistance (aac, aad, ant, arm)                                | negative |
| beta lactam resistance (dha, ctxM, pse, aac, blaCNY, oxa, cmv, per, shv, tem) | negative |
| bleomycin resistance (ble)                                                    | negative |
| chloramphenicol resistance (cat, cml)                                         | negative |
| erythromycin and roxythromycin resistance (qnr)                               | negative |
| erythromycin resistance (ere)                                                 | negative |
| florfenicol and chloramphenicol resistance (floR)                             | negative |
| fluoroquinolone resistance (qnr)                                              | negative |
| gentamicin resistance (aac)                                                   | negative |
| imipenem resistance (kpc)                                                     | negative |
| kanamycin resistance (aph)                                                    | negative |
| quinolone resistance (qnr)                                                    | negative |
| streptomycin resistance (sph, Str)                                            | negative |
| sulfonamide resistance (sul)                                                  | negative |
| tetracycline resistance (tet)                                                 | negative |
| trimethoprim resistance (dfr)                                                 | negative |

## Virulences

| description                    | result   |
|--------------------------------|----------|
| heat-stable enterotoxin (astA) | negative |
| integrases (intl)              | negative |
| plasmid Vi (tviA)              | negative |

## For Investigational Use Only. Not Intended for Use in Clinical Diagnostics.

**Operator** ---  
**Sample ID** ---  
**Experiment ID** S.e.e.\_California  
**Date of Result** Thu May 31 10:09:55 2012  
**Assay Name** salm-pm1  
**Assay ID** 10624  
**Well Position** 00 (00-H)  
**Software Version** 0.4  
**Device** ---  
**biotin** positive  
**negative control** negative  
**invA** positive  
**galF** positive  
**manC** positive

| score          | spp | serovare   | strain  | group O |   |            | H1    | H2    |
|----------------|-----|------------|---------|---------|---|------------|-------|-------|
| 0.65 (99.75 %) | I   | California | CDC1109 | B (O:4) | 4 | 4,12       | g,m,t | [z67] |
| 7.37 (97.11 %) | I   | Agona      | CDC1636 | B (O:4) | 4 | 1,4,[5],12 | f,g,s | [1,2] |

## Resistance Genotyping

| description                                                                   | result   |
|-------------------------------------------------------------------------------|----------|
| aminoglycoside resistance (aac, aad, ant, arm)                                | negative |
| beta lactam resistance (dha, ctxM, pse, aac, blaCNY, oxa, cmv, per, shv, tem) | negative |
| bleomycin resistance (ble)                                                    | negative |
| chloramphenicol resistance (cat, cml)                                         | negative |
| erythromycin and roxythromycin resistance (qnr)                               | negative |
| erythromycin resistance (ere)                                                 | negative |
| florfenicol and chloramphenicol resistance (floR)                             | negative |
| fluoroquinolone resistance (qnr)                                              | negative |
| gentamicin resistance (aac)                                                   | negative |
| imipenem resistance (kpc)                                                     | negative |
| kanamycin resistance (aph)                                                    | negative |
| quinolone resistance (qnr)                                                    | negative |
| streptomycin resistance (sph, Str)                                            | negative |
| sulfonamide resistance (sul)                                                  | negative |
| tetracycline resistance (tet)                                                 | negative |
| trimethoprim resistance (dfr)                                                 | negative |

## Virulences

| description                    | result   |
|--------------------------------|----------|
| heat-stable enterotoxin (astA) | negative |
| integrases (intl)              | negative |
| plasmid Vi (tviA)              | negative |

## For Investigational Use Only. Not Intended for Use in Clinical Diagnostics.

**Operator** ---  
**Sample ID** ---  
**Experiment ID** S.e.e.\_Nitra  
**Date of Result** Thu May 31 10:09:34 2012  
**Assay Name** salm-pm1  
**Assay ID** 10624  
**Well Position** 00 (00-H)  
**Software Version** 0.4  
**Device** ---  
**biotin** positive  
**negative control** negative  
**invA** positive  
**galF** positive  
**manC** positive

| score          | spp | serovare    | strain   | group O  |   |        | H1  | H2 |
|----------------|-----|-------------|----------|----------|---|--------|-----|----|
| 0.89 (99.65 %) | I   | Nitra       | CDC1280  | A (O:2)  | 2 | 2,12   | g,m | -  |
| 1.89 (99.26 %) | I   | Enteritidis | DSM14221 | D1 (O:9) | 9 | 1,9,12 | g,m | -  |

## Resistance Genotyping

| description                                                                   | result   |
|-------------------------------------------------------------------------------|----------|
| aminoglycoside resistance (aac, aad, ant, arm)                                | negative |
| beta lactam resistance (dha, ctxM, pse, aac, blaCNY, oxa, cmv, per, shv, tem) | negative |
| bleomycin resistance (ble)                                                    | negative |
| chloramphenicol resistance (cat, cml)                                         | negative |
| erythromycin and roxythromycin resistance (qnr)                               | negative |
| erythromycin resistance (ere)                                                 | negative |
| florfenicol and chloramphenicol resistance (floR)                             | negative |
| fluoroquinolone resistance (qnr)                                              | negative |
| gentamicin resistance (aac)                                                   | negative |
| imipenem resistance (kpc)                                                     | negative |
| kanamycin resistance (aph)                                                    | negative |
| quinolone resistance (qnr)                                                    | negative |
| streptomycin resistance (sph, Str)                                            | negative |
| sulfonamide resistance (sul)                                                  | negative |
| tetracycline resistance (tet)                                                 | negative |
| trimethoprim resistance (dfr)                                                 | negative |

## Virulences

| description                    | result   |
|--------------------------------|----------|
| heat-stable enterotoxin (astA) | negative |
| integrases (intl)              | negative |
| plasmid Vi (tviA)              | negative |



## For Investigational Use Only. Not Intended for Use in Clinical Diagnostics.

**Operator** ---  
**Sample ID** ---  
**Experiment ID** S.e.e.\_Uno  
**Date of Result** Thu May 31 10:08:29 2012  
**Assay Name** salm-pm1  
**Assay ID** 10624  
**Well Position** 00 (00-H)  
**Software Version** 0.4  
**Device** ---  
**biotin** positive  
**negative control** negative  
**invA** positive  
**galF** positive  
**manC** positive

| score          | spp | serovare | strain  | group O     |   |     | H1  | H2        |
|----------------|-----|----------|---------|-------------|---|-----|-----|-----------|
| 0.86 (99.66 %) | I   | Uno      | CDC1697 | C2-C3 (O:8) | 8 | 6,8 | z29 | [e,n,z15] |
| 6.94 (97.28 %) | I   | Hadar    | CDC347  | C2-C3 (O:8) | 8 | 6,8 | z10 | e,n,x     |

## Resistance Genotyping

| description                                                                   | result   |
|-------------------------------------------------------------------------------|----------|
| aminoglycoside resistance (aac, aad, ant, arm)                                | negative |
| beta lactam resistance (dha, ctxM, pse, aac, blaCNY, oxa, cmv, per, shv, tem) | negative |
| bleomycin resistance (ble)                                                    | negative |
| chloramphenicol resistance (cat, cml)                                         | negative |
| erythromycin and roxythromycin resistance (qnr)                               | negative |
| erythromycin resistance (ere)                                                 | negative |
| florfenicol and chloramphenicol resistance (floR)                             | negative |
| fluoroquinolone resistance (qnr)                                              | negative |
| gentamicin resistance (aac)                                                   | negative |
| imipenem resistance (kpc)                                                     | negative |
| kanamycin resistance (aph)                                                    | negative |
| quinolone resistance (qnr)                                                    | negative |
| streptomycin resistance (sph, Str)                                            | negative |
| sulfonamide resistance (sul)                                                  | negative |
| tetracycline resistance (tet)                                                 | negative |
| trimethoprim resistance (dfr)                                                 | negative |

## Virulences

| description                    | result   |
|--------------------------------|----------|
| heat-stable enterotoxin (astA) | negative |
| integrases (intl)              | negative |
| plasmid Vi (tviA)              | negative |

## For Investigational Use Only. Not Intended for Use in Clinical Diagnostics.

**Operator** ---  
**Sample ID** ---  
**Experiment ID** S.e.e.\_Breukelen  
**Date of Result** Thu May 31 10:08:34 2012  
**Assay Name** salm-pm1  
**Assay ID** 10624  
**Well Position** 00 (00-H)  
**Software Version** 0.4  
**Device** ---  
**biotin** positive  
**negative control** negative  
**invA** positive  
**galF** positive  
**manC** positive

| score           | spp | serovare  | strain  | group O     |   |     | H1          | H2      |
|-----------------|-----|-----------|---------|-------------|---|-----|-------------|---------|
| 1.15 (99.55 %)  | I   | Breukelen | CDC1699 | C2-C3 (O:8) | 8 | 6,8 | I,z13,[z28] | e,n,z15 |
| 11.36 (95.54 %) | I   | Hadar     | CDC347  | C2-C3 (O:8) | 8 | 6,8 | z10         | e,n,x   |

## Resistance Genotyping

| description                                                                   | result   |
|-------------------------------------------------------------------------------|----------|
| aminoglycoside resistance (aac, aad, ant, arm)                                | negative |
| beta lactam resistance (dha, ctxM, pse, aac, blaCNY, oxa, cmv, per, shv, tem) | negative |
| bleomycin resistance (ble)                                                    | negative |
| chloramphenicol resistance (cat, cml)                                         | negative |
| erythromycin and roxythromycin resistance (qnr)                               | negative |
| erythromycin resistance (ere)                                                 | negative |
| florfenicol and chloramphenicol resistance (floR)                             | negative |
| fluoroquinolone resistance (qnr)                                              | negative |
| gentamicin resistance (aac)                                                   | negative |
| imipenem resistance (kpc)                                                     | negative |
| kanamycin resistance (aph)                                                    | negative |
| quinolone resistance (qnr)                                                    | negative |
| streptomycin resistance (sph, Str)                                            | negative |
| sulfonamide resistance (sul)                                                  | negative |
| tetracycline resistance (tet)                                                 | negative |
| trimethoprim resistance (dfr)                                                 | negative |

## Virulences

| description                    | result   |
|--------------------------------|----------|
| heat-stable enterotoxin (astA) | negative |
| integrase (intl)               | negative |
| plasmid Vi (tviA)              | negative |

## For Investigational Use Only. Not Intended for Use in Clinical Diagnostics.

Operator ---

Sample ID ---

Experiment ID S.e.e.\_Corvallis

Date of Result Thu May 31 10:08:23 2012

Assay Name salm-pm1

Assay ID 10624

Well Position 00 (00-H)

Software Version 0.4

Device ---

biotin positive

negative control negative

invA positive

galF positive

manC positive

| score         | spp | serovare  | strain  | group O     |   |      | H1     | H2   |
|---------------|-----|-----------|---------|-------------|---|------|--------|------|
| 1.0 (99.61 %) | I   | Corvallis | CDC1770 | C2-C3 (O:8) | 8 | 8,20 | z4,z23 | [z6] |
| 7.8 (96.94 %) | I   | Kentucky  | CDC2590 | C2-C3 (O:8) | 8 | 8,20 | i      | z6   |

## Resistance Genotyping

| description                                                                   | result   |
|-------------------------------------------------------------------------------|----------|
| aminoglycoside resistance (aac, aad, ant, arm)                                | positive |
| beta lactam resistance (dha, ctxM, pse, aac, blaCNY, oxa, cmv, per, shv, tem) | negative |
| bleomycin resistance (ble)                                                    | negative |
| chloramphenicol resistance (cat, cml)                                         | positive |
| erythromycin and roxythromycin resistance (qnr)                               | negative |
| erythromycin resistance (ere)                                                 | negative |
| florfenicol and chloramphenicol resistance (floR)                             | negative |
| fluoroquinolone resistance (qnr)                                              | negative |
| gentamicin resistance (aac)                                                   | negative |
| imipenem resistance (kpc)                                                     | negative |
| kanamycin resistance (aph)                                                    | negative |
| quinolone resistance (qnr)                                                    | negative |
| streptomycin resistance (sph, Str)                                            | negative |
| sulfonamide resistance (sul)                                                  | positive |
| tetracycline resistance (tet)                                                 | negative |
| trimethoprim resistance (dfr)                                                 | negative |

## Virulences

| description                    | result   |
|--------------------------------|----------|
| integrases (intl)              | negative |
| plasmid Vi (tviA)              | negative |
| heat-stable enterotoxin (astA) | positive |

## For Investigational Use Only. Not Intended for Use in Clinical Diagnostics.

Operator ---

Sample ID ---

Experiment ID S.e.e.\_Kambole

Date of Result Thu May 31 10:08:12 2012

Assay Name salm-pm1

Assay ID 10624

Well Position 00 (00-H)

Software Version 0.4

Device ---

biotin positive

negative control negative

invA positive

galF positive

manC positive

| score           | spp | serovare  | strain   | group O  |   |     | H1 | H2      |
|-----------------|-----|-----------|----------|----------|---|-----|----|---------|
| 3.1 (98.78 %)   | I   | Kambole   | CDC1863  | C1 (O:7) | 7 | 6,7 | d  | 1,[2],7 |
| 10.36 (95.94 %) | I   | Typhisuis | SGSC2527 | C1 (O:7) | 7 | 6,7 | c  | 1,5     |

## Resistance Genotyping

| description                                                                   | result   |
|-------------------------------------------------------------------------------|----------|
| aminoglycoside resistance (aac, aad, ant, arm)                                | negative |
| beta lactam resistance (dha, ctxM, pse, aac, blaCNY, oxa, cmv, per, shv, tem) | negative |
| bleomycin resistance (ble)                                                    | negative |
| chloramphenicol resistance (cat, cml)                                         | negative |
| erythromycin and roxythromycin resistance (qnr)                               | negative |
| erythromycin resistance (ere)                                                 | negative |
| florfenicol and chloramphenicol resistance (floR)                             | negative |
| fluoroquinolone resistance (qnr)                                              | negative |
| gentamicin resistance (aac)                                                   | negative |
| imipenem resistance (kpc)                                                     | negative |
| kanamycin resistance (aph)                                                    | negative |
| quinolone resistance (qnr)                                                    | negative |
| streptomycin resistance (sph, Str)                                            | negative |
| sulfonamide resistance (sul)                                                  | negative |
| tetracycline resistance (tet)                                                 | negative |
| trimethoprim resistance (dfr)                                                 | negative |

## Virulences

| description                    | result   |
|--------------------------------|----------|
| heat-stable enterotoxin (astA) | negative |
| integrases (intl)              | negative |
| plasmid Vi (tviA)              | negative |

## For Investigational Use Only. Not Intended for Use in Clinical Diagnostics.

**Operator** ---  
**Sample ID** ---  
**Experiment ID** S.e.e.\_Montevideo  
**Date of Result** Thu May 31 10:08:18 2012  
**Assay Name** salm-pm1  
**Assay ID** 10624  
**Well Position** 00 (00-H)  
**Software Version** 0.4  
**Device** ---  
**biotin** positive  
**negative control** negative  
**invA** positive  
**galF** positive  
**manC** positive

| score          | spp | serovare   | strain     | group O  |   |        | H1        | H2      |
|----------------|-----|------------|------------|----------|---|--------|-----------|---------|
| 1.22 (99.52 %) | I   | Montevideo | CDC1904    | C1 (O:7) | 7 | 6,7,14 | g,m,[p],s | [1,2,7] |
| 3.33 (98.7 %)  | I   | Montevideo | SA20030523 | C1 (O:7) | 7 | 6,7,14 | g,m,[p],s | [1,2,7] |

## Resistance Genotyping

| description                                                                   | result   |
|-------------------------------------------------------------------------------|----------|
| aminoglycoside resistance (aac, aad, ant, arm)                                | negative |
| beta lactam resistance (dha, ctxM, pse, aac, blaCNY, oxa, cmv, per, shv, tem) | negative |
| bleomycin resistance (ble)                                                    | negative |
| chloramphenicol resistance (cat, cml)                                         | negative |
| erythromycin and roxythromycin resistance (qnr)                               | negative |
| erythromycin resistance (ere)                                                 | negative |
| florfenicol and chloramphenicol resistance (floR)                             | negative |
| fluoroquinolone resistance (qnr)                                              | negative |
| gentamicin resistance (aac)                                                   | negative |
| imipenem resistance (kpc)                                                     | negative |
| kanamycin resistance (aph)                                                    | negative |
| quinolone resistance (qnr)                                                    | negative |
| streptomycin resistance (sph, Str)                                            | negative |
| sulfonamide resistance (sul)                                                  | negative |
| tetracycline resistance (tet)                                                 | negative |
| trimethoprim resistance (dfr)                                                 | negative |

## Virulences

| description                    | result   |
|--------------------------------|----------|
| heat-stable enterotoxin (astA) | negative |
| integrases (intl)              | negative |
| plasmid Vi (tviA)              | negative |

## For Investigational Use Only. Not Intended for Use in Clinical Diagnostics.

**Operator** ---  
**Sample ID** ---  
**Experiment ID** S.e.e.\_Brandenburg  
**Date of Result** Thu May 31 18:20:06 2012  
**Assay Name** salm-pm1  
**Assay ID** 10624  
**Well Position** 00 (00-H)  
**Software Version** 0.4  
**Device** ---  
**biotin** positive  
**negative control** negative  
**invA** positive  
**galF** positive  
**manC** positive

| score          | spp | serovare    | strain  | group O |   |            | H1  | H2      |
|----------------|-----|-------------|---------|---------|---|------------|-----|---------|
| 0.0 (100.0 %)  | I   | Brandenburg | CDC2519 | B (O:4) | 4 | 4,[5],12   | I,v | e,n,z15 |
| 7.46 (97.07 %) | I   | Sandiego    | CDC18   | B (O:4) | 4 | 1,4,[5],12 | e,h | e,n,z15 |

## Resistance Genotyping

| description                                                                   | result   |
|-------------------------------------------------------------------------------|----------|
| aminoglycoside resistance (aac, aad, ant, arm)                                | negative |
| beta lactam resistance (dha, ctxM, pse, aac, blaCNY, oxa, cmv, per, shv, tem) | negative |
| bleomycin resistance (ble)                                                    | negative |
| chloramphenicol resistance (cat, cml)                                         | negative |
| erythromycin and roxythromycin resistance (qnr)                               | negative |
| erythromycin resistance (ere)                                                 | negative |
| florfenicol and chloramphenicol resistance (floR)                             | negative |
| fluoroquinolone resistance (qnr)                                              | negative |
| gentamicin resistance (aac)                                                   | negative |
| imipenem resistance (kpc)                                                     | negative |
| kanamycin resistance (aph)                                                    | negative |
| quinolone resistance (qnr)                                                    | negative |
| streptomycin resistance (sph, Str)                                            | positive |
| sulfonamide resistance (sul)                                                  | negative |
| tetracycline resistance (tet)                                                 | positive |
| trimethoprim resistance (dfr)                                                 | negative |

## Virulences

| description                    | result   |
|--------------------------------|----------|
| heat-stable enterotoxin (astA) | negative |
| integrases (intl)              | negative |
| plasmid Vi (tviA)              | negative |

## For Investigational Use Only. Not Intended for Use in Clinical Diagnostics.

**Operator** ---  
**Sample ID** ---  
**Experiment ID** S.e.e. Franken  
**Date of Result** Thu May 31 09:53:48 2012  
**Assay Name** salm-pm1  
**Assay ID** 10624  
**Well Position** 00 (00-H)  
**Software Version** 0.4  
**Device** ---  
**biotin** positive  
**negative control** negative  
**invA** positive  
**galF** positive  
**manC** positive

| score          | spp | serovare | strain  | group O     |      |      | H1  | H2  |
|----------------|-----|----------|---------|-------------|------|------|-----|-----|
| 0.73 (99.72 %) | I   | Franken  | CDC2570 | D1 (O:9)    | 9    | 9,12 | z6  | z67 |
| 7.43 (97.08 %) | I   | Fresno   | CDC1412 | D2 (O:9,46) | 9,46 | 9,46 | z38 | -   |

## Resistance Genotyping

| description                                                                   | result   |
|-------------------------------------------------------------------------------|----------|
| aminoglycoside resistance (aac, aad, ant, arm)                                | negative |
| beta lactam resistance (dha, ctxM, pse, aac, blaCNY, oxa, cmv, per, shv, tem) | negative |
| bleomycin resistance (ble)                                                    | negative |
| chloramphenicol resistance (cat, cml)                                         | negative |
| erythromycin and roxythromycin resistance (qnr)                               | negative |
| erythromycin resistance (ere)                                                 | negative |
| florfenicol and chloramphenicol resistance (floR)                             | negative |
| fluoroquinolone resistance (qnr)                                              | negative |
| gentamicin resistance (aac)                                                   | negative |
| imipenem resistance (kpc)                                                     | negative |
| kanamycin resistance (aph)                                                    | negative |
| quinolone resistance (qnr)                                                    | negative |
| streptomycin resistance (sph, Str)                                            | negative |
| sulfonamide resistance (sul)                                                  | negative |
| tetracycline resistance (tet)                                                 | negative |
| trimethoprim resistance (dfr)                                                 | negative |

## Virulences

| description                    | result   |
|--------------------------------|----------|
| heat-stable enterotoxin (astA) | negative |
| integrases (intl)              | negative |
| plasmid Vi (tviA)              | negative |

## For Investigational Use Only. Not Intended for Use in Clinical Diagnostics.

**Operator** ---  
**Sample ID** ---  
**Experiment ID** S.e.e.\_Singapore  
**Date of Result** Thu May 31 10:07:39 2012  
**Assay Name** salm-pm1  
**Assay ID** 10624  
**Well Position** 00 (00-H)  
**Software Version** 0.4  
**Device** ---  
**biotin** positive  
**negative control** negative  
**invA** positive  
**galF** positive  
**manC** positive

| score           | spp | serovare  | strain    | group O  |   |     | H1    | H2    |
|-----------------|-----|-----------|-----------|----------|---|-----|-------|-------|
| 0.6 (99.77 %)   | I   | Singapore | CDC010011 | C1 (O:7) | 7 | 6,7 | k     | e,n,x |
| 11.11 (95.64 %) | I   | Kenya     | CDC497    | C1 (O:7) | 7 | 6,7 | l,z13 | e,n,x |

## Resistance Genotyping

| description                                                                   | result   |
|-------------------------------------------------------------------------------|----------|
| aminoglycoside resistance (aac, aad, ant, arm)                                | positive |
| beta lactam resistance (dha, ctxM, pse, aac, blaCNY, oxa, cmv, per, shv, tem) | negative |
| bleomycin resistance (ble)                                                    | negative |
| chloramphenicol resistance (cat, cml)                                         | negative |
| erythromycin and roxythromycin resistance (qnr)                               | negative |
| erythromycin resistance (ere)                                                 | negative |
| florfenicol and chloramphenicol resistance (floR)                             | negative |
| fluoroquinolone resistance (qnr)                                              | negative |
| gentamicin resistance (aac)                                                   | negative |
| imipenem resistance (kpc)                                                     | negative |
| kanamycin resistance (aph)                                                    | negative |
| quinolone resistance (qnr)                                                    | negative |
| streptomycin resistance (sph, Str)                                            | positive |
| sulfonamide resistance (sul)                                                  | positive |
| tetracycline resistance (tet)                                                 | positive |
| trimethoprim resistance (dfr)                                                 | positive |

## Virulences

| description                    | result   |
|--------------------------------|----------|
| heat-stable enterotoxin (astA) | negative |
| plasmid Vi (tviA)              | negative |
| integrases (intl)              | positive |



## For Investigational Use Only. Not Intended for Use in Clinical Diagnostics.

**Operator** ---  
**Sample ID** ---  
**Experiment ID** S.e.e.\_Heidelberg  
**Date of Result** Thu May 31 09:55:11 2012  
**Assay Name** salm-pm1  
**Assay ID** 10624  
**Well Position** 00 (00-H)  
**Software Version** 0.4  
**Device** ---  
**biotin** positive  
**negative control** negative  
**invA** positive  
**galF** positive  
**manC** positive

| score          | spp | serovare   | strain  | group O |   |            | H1 | H2  |
|----------------|-----|------------|---------|---------|---|------------|----|-----|
| 1.25 (99.51 %) | I   | Heidelberg | CDC16   | B (O:4) | 4 | 1,4,[5],12 | r  | 1,2 |
| 2.82 (98.89 %) | I   | Heidelberg | DSM9379 | B (O:4) | 4 | 1,4,[5],12 | r  | 1,2 |

## Resistance Genotyping

| description                                                                   | result   |
|-------------------------------------------------------------------------------|----------|
| aminoglycoside resistance (aac, aad, ant, arm)                                | negative |
| beta lactam resistance (dha, ctxM, pse, aac, blaCNY, oxa, cmv, per, shv, tem) | negative |
| bleomycin resistance (ble)                                                    | negative |
| chloramphenicol resistance (cat, cml)                                         | negative |
| erythromycin and roxythromycin resistance (qnr)                               | negative |
| erythromycin resistance (ere)                                                 | negative |
| florfenicol and chloramphenicol resistance (floR)                             | negative |
| fluoroquinolone resistance (qnr)                                              | negative |
| gentamicin resistance (aac)                                                   | negative |
| imipenem resistance (kpc)                                                     | negative |
| kanamycin resistance (aph)                                                    | negative |
| quinolone resistance (qnr)                                                    | negative |
| streptomycin resistance (sph, Str)                                            | negative |
| sulfonamide resistance (sul)                                                  | negative |
| tetracycline resistance (tet)                                                 | negative |
| trimethoprim resistance (dfr)                                                 | negative |

## Virulences

| description                    | result   |
|--------------------------------|----------|
| heat-stable enterotoxin (astA) | negative |
| integrases (intl)              | negative |
| plasmid Vi (tviA)              | negative |

## For Investigational Use Only. Not Intended for Use in Clinical Diagnostics.

**Operator** ---

**Sample ID** ---

**Experiment ID** Salmonella enterica ssp. enterica\_Gallinarum

**Date of Result** Thu May 31 18:07:58 2012

**Assay Name** salm-pm1

**Assay ID** 10624

**Well Position** 00 (00-H)

**Software Version** 0.4

**Device** ---

**biotin** positive

**negative control** negative

**invA** positive

**galF** positive

**manC** positive

| score          | spp | serovare   | strain   | group O  |   |        | H1 | H2 |
|----------------|-----|------------|----------|----------|---|--------|----|----|
| 0.0 (100.0 %)  | I   | Gallinarum | DSM13674 | D1 (O:9) | 9 | 1,9,12 | -  | -  |
| 2.95 (98.84 %) | I   | Gallinarum | CDC74    | D1 (O:9) | 9 | 1,9,12 | -  | -  |

## Resistance Genotyping

| description                                                                   | result   |
|-------------------------------------------------------------------------------|----------|
| aminoglycoside resistance (aac, aad, ant, arm)                                | negative |
| beta lactam resistance (dha, ctxM, pse, aac, blaCNY, oxa, cmv, per, shv, tem) | negative |
| bleomycin resistance (ble)                                                    | negative |
| chloramphenicol resistance (cat, cml)                                         | negative |
| erythromycin and roxythromycin resistance (qnr)                               | negative |
| erythromycin resistance (ere)                                                 | negative |
| florfenicol and chloramphenicol resistance (floR)                             | negative |
| fluoroquinolone resistance (qnr)                                              | negative |
| gentamicin resistance (aac)                                                   | negative |
| imipenem resistance (kpc)                                                     | negative |
| kanamycin resistance (aph)                                                    | negative |
| quinolone resistance (qnr)                                                    | negative |
| streptomycin resistance (sph, Str)                                            | negative |
| sulfonamide resistance (sul)                                                  | negative |
| tetracycline resistance (tet)                                                 | negative |
| trimethoprim resistance (dfr)                                                 | negative |

## Virulences

| description                    | result   |
|--------------------------------|----------|
| heat-stable enterotoxin (astA) | negative |
| integrases (intl)              | negative |
| plasmid Vi (tviA)              | negative |

# For Investigational Use Only. Not Intended for Use in Clinical Diagnostics.

**Operator** ---

**Sample ID** ---

**Experiment ID** Salmonella enterica ssp. enterica\_Typhimurium (LT2)

**Date of Result** Thu May 31 10:00:35 2012

**Assay Name** salm-pm1

**Assay ID** 10624

**Well Position** 00 (00-H)

**Software  
Version** 0.4

**Device** ---

**biotin** positive

**negative control** negative

**invA** positive

**galF** positive

**manC** positive

| score          | spp | serovare    | strain   | group O |   |            | H1 | H2  |
|----------------|-----|-------------|----------|---------|---|------------|----|-----|
| 5.22 (97.95 %) | I   | Typhimurium | DSM17058 | B (O:4) | 4 | 1,4,[5],12 | i  | 1,2 |
| 5.97 (97.66 %) | I   | Typhimurium | DSM19587 | B (O:4) | 4 | 1,4,[5],12 | i  | 1,2 |

## Resistance Genotyping

| description                                                                   | result   |
|-------------------------------------------------------------------------------|----------|
| aminoglycoside resistance (aac, aad, ant, arm)                                | negative |
| beta lactam resistance (dha, ctxM, pse, aac, blaCNY, oxa, cmy, per, shv, tem) | negative |
| bleomycin resistance (ble)                                                    | negative |
| chloramphenicol resistance (cat, cml)                                         | negative |
| erythromycin and roxythromycin resistance (qnr)                               | negative |
| erythromycin resistance (ere)                                                 | negative |
| florfenicol and chloramphenicol resistance (floR)                             | negative |
| fluoroquinolone resistance (qnr)                                              | negative |
| gentamicin resistance (aac)                                                   | negative |
| imipenem resistance (kpc)                                                     | negative |
| kanamycin resistance (aph)                                                    | negative |
| quinolone resistance (qnr)                                                    | negative |
| streptomycin resistance (sph, Str)                                            | negative |
| sulfonamide resistance (sul)                                                  | negative |
| tetracycline resistance (tet)                                                 | negative |
| trimethoprim resistance (dfr)                                                 | negative |

## Virulences

| description                    | result   |
|--------------------------------|----------|
| heat-stable enterotoxin (astA) | negative |
| integrases (intl)              | negative |
| plasmid Vi (tviA)              | negative |

## For Investigational Use Only. Not Intended for Use in Clinical Diagnostics.

**Operator** ---

**Sample ID** ---

**Experiment ID** Salmonella enterica spp. enterica\_Enteritidis

**Date of Result** Thu May 31 18:12:09 2012

**Assay Name** salm-pm1

**Assay ID** 10624

**Well Position** 00 (00-H)

**Software Version** 0.4

**Device** ---

**biotin** positive

**negative control** negative

**invA** positive

**galF** positive

**manC** positive

| score          | spp | serovare    | strain   | group O  |   |        | H1  | H2 |
|----------------|-----|-------------|----------|----------|---|--------|-----|----|
| 0.0 (100.0 %)  | I   | Enteritidis | ST010    | D1 (O:9) | 9 | 1,9,12 | g,m | -  |
| 2.08 (99.18 %) | I   | Enteritidis | DSM17420 | D1 (O:9) | 9 | 1,9,12 | g,m | -  |

## Resistance Genotyping

| description                                                                   | result   |
|-------------------------------------------------------------------------------|----------|
| aminoglycoside resistance (aac, aad, ant, arm)                                | negative |
| beta lactam resistance (dha, ctxM, pse, aac, blaCNY, oxa, cmv, per, shv, tem) | negative |
| bleomycin resistance (ble)                                                    | negative |
| chloramphenicol resistance (cat, cml)                                         | negative |
| erythromycin and roxythromycin resistance (qnr)                               | negative |
| erythromycin resistance (ere)                                                 | negative |
| florfenicol and chloramphenicol resistance (floR)                             | negative |
| fluoroquinolone resistance (qnr)                                              | negative |
| gentamicin resistance (aac)                                                   | negative |
| imipenem resistance (kpc)                                                     | negative |
| kanamycin resistance (aph)                                                    | negative |
| quinolone resistance (qnr)                                                    | negative |
| streptomycin resistance (sph, Str)                                            | negative |
| sulfonamide resistance (sul)                                                  | negative |
| tetracycline resistance (tet)                                                 | negative |
| trimethoprim resistance (dfr)                                                 | negative |

## Virulences

| description                    | result   |
|--------------------------------|----------|
| heat-stable enterotoxin (astA) | negative |
| integrases (intl)              | negative |
| plasmid Vi (tviA)              | negative |

**For Investigational Use Only. Not Intended for Use in Clinical Diagnostics.**

**Operator** ---

**Sample ID** ---

**Experiment ID** Salmonella enterica ssp. enterica

**Date of Result** Mon Nov 28 17:42:10 2011

**Assay Name** salm-pm1

**Assay ID** 10624

**Well Position** 00 (00-H)

**Software Version** 0.4

**Device** ---

**biotin** positive

**negative control** negative

| score   | spp | species                           | strain   | stringenz | serovare    | group O          |  |  | H1   | H2        |
|---------|-----|-----------------------------------|----------|-----------|-------------|------------------|--|--|------|-----------|
| 99.78 % | I   | Salmonella enterica ssp. enterica | DSM4224  |           | Abony       | 1,4, [5], 12, 27 |  |  | b    | e, n, x   |
| 97.05 % | I   | Salmonella enterica spp. enterica | SGSC2460 |           | Brandenburg | 4                |  |  | l, v | e, n, z15 |

## Resistance Genotyping

| description                                                                   | result   |
|-------------------------------------------------------------------------------|----------|
| aminoglycoside resistance (aac, aad, ant, arm)                                | negative |
| beta lactam resistance (dha, ctxM, pse, aac, blaCNY, oxa, cmy, per, shv, tem) | negative |
| bleomycin resistance (ble)                                                    | negative |
| chloramphenicol resistance (cat, cml)                                         | negative |
| erythromycin and roxythromycin resistance (qnr)                               | negative |
| erythromycin resistance (ere)                                                 | negative |
| florfenicol and chloramphenicol resistance (floR)                             | negative |
| fluoroquinolone resistance (qnr)                                              | negative |
| gentamicin resistance (aac)                                                   | negative |
| imipenem resistance (kpc)                                                     | negative |
| kanamycin resistance (aph)                                                    | negative |
| located next to mphA, function unknown (mrx)                                  | negative |
| quinolone resistance (qnr)                                                    | negative |
| streptomycin resistance (sph, Str)                                            | negative |
| sulfonamide resistance (sul)                                                  | negative |
| tetracycline resistance (tet)                                                 | negative |
| trimethoprim resistance (dfr)                                                 | negative |

## Virulances

| description        | result   |
|--------------------|----------|
| enterotoxin (astA) | negative |
| integrases (intl)  | negative |
| plasmid Vi (tviA)  | negative |

## For Investigational Use Only. Not Intended for Use in Clinical Diagnostics.

**Operator** ---

**Sample ID** ---

**Experiment ID** Salmonella bongori

**Date of Result** Thu May 31 18:10:57 2012

**Assay Name** salm-pm1

**Assay ID** 10624

**Well Position** 00 (00-H)

**Software Version** 0.4

**Device** ---

**biotin** positive

**negative control** negative

**invA** positive

**galF** negative

**manC** negative

| score           | spp | serovare | strain   | group O  |    |    | H1     | H2 |
|-----------------|-----|----------|----------|----------|----|----|--------|----|
| 0.0 (100.0 %)   | V   | 66:z41:- | DSM13774 | O:66     | 66 | 66 | z41    | -  |
| 11.08 (95.65 %) | I   | Alachua  | CDC325   | O (O:35) | 35 | 35 | z4,z23 | -  |

## Resistance Genotyping

| description                                                                   | result   |
|-------------------------------------------------------------------------------|----------|
| aminoglycoside resistance (aac, aad, ant, arm)                                | negative |
| beta lactam resistance (dha, ctxM, pse, aac, blaCNY, oxa, cmv, per, shv, tem) | negative |
| bleomycin resistance (ble)                                                    | negative |
| chloramphenicol resistance (cat, cml)                                         | negative |
| erythromycin and roxythromycin resistance (qnr)                               | negative |
| erythromycin resistance (ere)                                                 | negative |
| florfenicol and chloramphenicol resistance (floR)                             | negative |
| fluoroquinolone resistance (qnr)                                              | negative |
| gentamicin resistance (aac)                                                   | negative |
| imipenem resistance (kpc)                                                     | negative |
| kanamycin resistance (aph)                                                    | negative |
| quinolone resistance (qnr)                                                    | negative |
| streptomycin resistance (sph, Str)                                            | negative |
| sulfonamide resistance (sul)                                                  | negative |
| tetracycline resistance (tet)                                                 | negative |
| trimethoprim resistance (dfr)                                                 | negative |

## Virulences

| description                    | result   |
|--------------------------------|----------|
| heat-stable enterotoxin (astA) | negative |
| integrases (intl)              | negative |
| plasmid Vi (tviA)              | negative |

## For Investigational Use Only. Not Intended for Use in Clinical Diagnostics.

**Operator** ---

**Sample ID** ---

**Experiment ID** Salmonella enterica ssp. enterica\_Paratyphi B

**Date of Result** Thu May 31 09:55:05 2012

**Assay Name** salm-pm1

**Assay ID** 10624

**Well Position** 00 (00-H)

**Software Version** 0.4

**Device** ---

**biotin** positive

**negative control** negative

**invA** positive

**galF** positive

**manC** positive

| score          | spp | serovare    | strain   | group O |   |            | H1 | H2  |
|----------------|-----|-------------|----------|---------|---|------------|----|-----|
| 0.61 (99.76 %) | I   | Paratyphi B | 10-62165 | B (O:4) | 4 | 1,4,[5],12 | b  | 1,2 |
| 4.91 (98.07 %) | I   | Heidelberg  | DSM9379  | B (O:4) | 4 | 1,4,[5],12 | r  | 1,2 |

## Resistance Genotyping

| description                                                                   | result   |
|-------------------------------------------------------------------------------|----------|
| aminoglycoside resistance (aac, aad, ant, arm)                                | negative |
| beta lactam resistance (dha, ctxM, pse, aac, blaCNY, oxa, cmv, per, shv, tem) | negative |
| bleomycin resistance (ble)                                                    | negative |
| chloramphenicol resistance (cat, cml)                                         | negative |
| erythromycin and roxythromycin resistance (qnr)                               | negative |
| erythromycin resistance (ere)                                                 | negative |
| florfenicol and chloramphenicol resistance (floR)                             | negative |
| fluoroquinolone resistance (qnr)                                              | negative |
| gentamicin resistance (aac)                                                   | negative |
| imipenem resistance (kpc)                                                     | negative |
| kanamycin resistance (aph)                                                    | negative |
| quinolone resistance (qnr)                                                    | negative |
| streptomycin resistance (sph, Str)                                            | negative |
| sulfonamide resistance (sul)                                                  | negative |
| tetracycline resistance (tet)                                                 | negative |
| trimethoprim resistance (dfr)                                                 | negative |

## Virulences

| description                    | result   |
|--------------------------------|----------|
| heat-stable enterotoxin (astA) | negative |
| integrases (intl)              | negative |
| plasmid Vi (tviA)              | negative |

## For Investigational Use Only. Not Intended for Use in Clinical Diagnostics.

Operator ---

Sample ID ---

Experiment ID Salmonella enterica spp. enterica\_Bredeney

Date of Result Mon Nov 28 17:39:03 2011

Assay Name salm-pm1

Assay ID 10624

Well Position 00 (00-H)

Software Version 0.4

Device ---

biotin positive

negative control negative

| score   | spp | species                           | strain | stringenz | serovare | group O | H1 | H2      |
|---------|-----|-----------------------------------|--------|-----------|----------|---------|----|---------|
| 97.43 % | I   | Salmonella enterica spp. enterica | 96     |           | Bredeney | 4       |    | I,v 1,7 |
| 95.64 % | I   | Salmonella enterica spp. enterica | SK025  |           | Give     | 3,10    |    | I,v 1,7 |

## Resistance Genotyping

| description                                                                   | result   |
|-------------------------------------------------------------------------------|----------|
| aminoglycoside resistance (aac, aad, ant, arm)                                | negative |
| beta lactam resistance (dha, ctxM, pse, aac, blaCNY, oxa, cmv, per, shv, tem) | negative |
| bleomycin resistance (ble)                                                    | negative |
| chloramphenicol resistance (cat, cml)                                         | negative |
| erythromycin and roxythromycin resistance (qnr)                               | negative |
| erythromycin resistance (ere)                                                 | negative |
| florfenicol and chloramphenicol resistance (floR)                             | negative |
| fluoroquinolone resistance (qnr)                                              | negative |
| gentamicin resistance (aac)                                                   | negative |
| imipenem resistance (kpc)                                                     | negative |
| kanamycin resistance (aph)                                                    | negative |
| located next to mphA, function unknown (mrx)                                  | negative |
| quinolone resistance (qnr)                                                    | negative |
| streptomycin resistance (sph, Str)                                            | negative |
| sulfonamide resistance (sul)                                                  | negative |
| tetracycline resistance (tet)                                                 | positive |
| trimethoprim resistance (dfr)                                                 | positive |

## Virulances

| description        | result   |
|--------------------|----------|
| enterotoxin (astA) | negative |
| integrases (intl)  | negative |
| plasmid Vi (tviA)  | negative |



## For Investigational Use Only. Not Intended for Use in Clinical Diagnostics.

**Operator** ---

**Sample ID** ---

**Experiment ID** Salmonella enterica spp. enterica\_Panama

**Date of Result** Thu May 31 18:13:51 2012

**Assay Name** salm-pm1

**Assay ID** 10624

**Well Position** 00 (00-H)

**Software Version** 0.4

**Device** ---

**biotin** positive

**negative control** negative

**invA** positive

**galF** positive

**manC** positive

| score          | spp | serovare | strain   | group O  |   |        | H1  | H2  |
|----------------|-----|----------|----------|----------|---|--------|-----|-----|
| 0.0 (100.0 %)  | I   | Panama   | SGSC2496 | D1 (O:9) | 9 | 1,9,12 | I,v | 1,5 |
| 1.91 (99.25 %) | I   | Panama   | K017     | D1 (O:9) | 9 | 1,9,12 | I,v | 1,5 |

## Resistance Genotyping

| description                                                                   | result   |
|-------------------------------------------------------------------------------|----------|
| aminoglycoside resistance (aac, aad, ant, arm)                                | negative |
| beta lactam resistance (dha, ctxM, pse, aac, blaCNY, oxa, cmv, per, shv, tem) | negative |
| bleomycin resistance (ble)                                                    | negative |
| chloramphenicol resistance (cat, cml)                                         | negative |
| erythromycin and roxythromycin resistance (qnr)                               | negative |
| erythromycin resistance (ere)                                                 | negative |
| florfenicol and chloramphenicol resistance (floR)                             | negative |
| fluoroquinolone resistance (qnr)                                              | negative |
| gentamicin resistance (aac)                                                   | negative |
| imipenem resistance (kpc)                                                     | negative |
| kanamycin resistance (aph)                                                    | negative |
| quinolone resistance (qnr)                                                    | negative |
| streptomycin resistance (sph, Str)                                            | negative |
| sulfonamide resistance (sul)                                                  | negative |
| tetracycline resistance (tet)                                                 | negative |
| trimethoprim resistance (dfr)                                                 | negative |

## Virulences

| description                    | result   |
|--------------------------------|----------|
| heat-stable enterotoxin (astA) | negative |
| integrase (intl)               | negative |
| plasmid Vi (tviA)              | negative |
